# Supplementary material for: SEEQ-DE
Source: Atypon-hosted journal article supplement (doi:10.1026/0012-1924/a000274), 2021-06-14
Supplement: 0012-1924_a000274_esm1.pdf [file 0012-1924_a000274_esm1.pdf]

**ESM 1.** Beispiele für im deutschsprachigen Raum verwendete Instrumente zur Erfassung von Lehrqualität sowie internationale Übersetzungen des SEEQ

*Beispiele für im deutschsprachigen Raum verwendete multifaktorielle Instrumente zur Erfassung von Lehrqualität*

- Basler, H., Bolm, G., Dickescheid, T. & Herda, C. (1995). Marburger Fragebogen zur Akzeptanz der Lehre. *Diagnostica*, 41, 62–79.
- Braun, E., Gusy, B., Leidner, B. & Hannover, B. (2008). Das Berliner Evaluationsinstrument für selbsteingeschätzte, studentische Kompetenzen. *Diagnostica*, 54(1), 30–42. <https://doi.org/10.1026/0012-1924.54.1.30>
- Gediga, G., von Kannen, K., Schnieder, F., Köhne, S., Luck, H. & Schneider, B. (2000). *KIEL*. Bissendorf: Methodos.
- Gollwitzer, M. & Schlotz, W. (2003). Das „Trierer Inventar zur Lehrveranstaltungsevaluation“. In G. Krampen & H. Zayer (Hrsg.), *Psychologiedidaktik und Evaluation* (S. 114–128). Bonn: DPV.
- Rindermann, H. (2009). *Lehrevaluation* (2. Aufl.). Landau: VEP.
- Staufenbiel, T. (2000). Fragebogen zur Evaluation von universitären Lehrveranstaltungen durch Studierende und Lehrende. *Diagnostica*, 46(4), 169–181. <https://doi.org/10.1026//0012-1924.46.4.169>
- Thiel, F., Blüthmann, I. & Watermann, R. (2012). Konstruktion eines Fragebogens zur Erfassung der Lehrkompetenz (LeKo). In B. Berendt & H. Voss (Hrsg.), *Neues Handbuch Hochschullehre*. Berlin: Raabe.

*Beispiele für internationale Übersetzungen des SEEQ*

- Al-Muslim, M. & Arifin, Z. (2015). The usability of SEEQ in quality evaluation of Arabic secondary education in Malaysia. *International Education Studies*, 8(3), 202–211. <https://doi.org/10.5539/ies.v8n3p202>
- Balam, E. M. & Shannon, D. M. (2010). Student ratings of college teaching: A comparison of faculty and their students. *Assessment & Evaluation in Higher Education*, 35(2), 209–221. <https://doi.org/10.1080/02602930902795901>
- Coffey, M. & Gibbs, G. (2001). The evaluation of the Student Evaluation of Educational Quality Questionnaire (SEEQ) in UK higher education. *Assessment & Evaluation in Higher Education*, 26(1), 89–93. <https://doi.org/10.1080/02602930020022318>
- Grammatikopoulos, V., Linardakis, M., Gregoriadis, A. & Oikonomidis, V. (2015). Assessing the Students' Evaluations of Educational Quality (SEEQ) questionnaire in Greek higher education. *Higher Education*, 70, 395–408. <https://doi.org/10.1007/s10734-014-9837-7>
- Jaremvongrayab, A. (2007). The validity evidence of first order and higher order factor structure of Thai version of Marsh's Students' Evaluation of Educational Quality. In *Proceedings of the Redesigning Pedagogy*, Singapore, May 2007.
- Tale'pasand, S., Nazifi, M. & Bigdeli, I. (2009). Validation of the Iranian version of student's evaluation of educational quality questionnaire. *International Journal of Behavioral Sciences*, 3, 127–134.
- Watkins, D. & Thomas, B. (1991). Assessing teaching effectiveness: An Indian perspective. *Assessment and Evaluation in Higher Education*, 16(3), 185–198. <https://doi.org/10.1080/0260293910160302>
