# Supplementary material for: SEEQ-DE
Source: Atypon-hosted journal article supplement (doi:10.1026/0012-1924/a000274), 2021-06-14
Supplement: 0012-1924_a000274_esm2.pdf [file 0012-1924_a000274_esm2.pdf]

ESM 2. Items des SEEQ-DE

| SEEQ-DE                                                                                                                                                              | Original SEEQ                                                                               |
|----------------------------------------------------------------------------------------------------------------------------------------------------------------------|---------------------------------------------------------------------------------------------|
| <b>Lernzuwachs<sup>a</sup></b>                                                                                                                                       | <b>Learning/Value</b>                                                                       |
| 1. Ich habe in dieser Veranstaltung Dinge gelernt, die sinnvoll und wichtig sind.                                                                                    | You have learned something which you consider valuable.                                     |
| 2. Mein Interesse an den behandelten Inhalten ist durch diese Veranstaltung gestiegen.                                                                               | Your interest in the subject has increased as a consequence of this course.                 |
| 3. Den Stoff dieser Veranstaltung habe ich verstanden.                                                                                                               | You have learned and understood the subject materials in this course.                       |
| 4. Ich habe viel in dieser Veranstaltung dazu gelernt.                                                                                                               | —                                                                                           |
| 5. Diese Veranstaltung regt mich zum Nachdenken an.                                                                                                                  | You find the course intellectually challenging and stimulating.                             |
| <b>Gesamtbeurteilung<sup>b</sup></b>                                                                                                                                 | <b>Overall Course Rating</b>                                                                |
| 36. Wie schneidet diese Veranstaltung im Vergleich zu anderen Lehrveranstaltungen ab, die Sie belegt haben?                                                          | How does this course compare with other courses you have had?                               |
| 37. Wie schneidet diese Lehrperson im Vergleich zu anderen Lehrpersonen ab, die Sie hatten?                                                                          | How does this instructor compare with other instructors you have had?                       |
| 39. Welche Note geben Sie der Veranstaltung insgesamt?*                                                                                                              | —                                                                                           |
| 40. Welche Note geben Sie der Lehrperson insgesamt?*                                                                                                                 | —                                                                                           |
| <b>Engagement der Lehrperson<sup>a</sup></b>                                                                                                                         | <b>Instructor Enthusiasm</b>                                                                |
| 6. Die Lehrperson ist begeistert von ihrer Lehrtätigkeit.                                                                                                            | Instructor is enthusiastic about teaching the course.                                       |
| 7. Die Lehrperson hält die Veranstaltung dynamisch und aktiv.                                                                                                        | Instructor is dynamic and energetic in conducting the course.                               |
| 8. Die Lehrperson nutzt Humor, um ihre Darstellungen anschaulicher zu machen.                                                                                        | Instructor enhances presentations with the use of humor.                                    |
| 9. Durch die Art und Weise, wie die Lehrperson die Inhalte darstellt, bleibt mein Interesse während der Sitzungen aufrechterhalten.                                  | Instructor's style of presentation held your interest during class.                         |
| <b>Strukturierung und Präsentation<sup>a</sup></b>                                                                                                                   | <b>Organization/Clarity</b>                                                                 |
| 10. Die Erklärungen der Lehrperson sind verständlich.                                                                                                                | Instructor's explanations are clear.                                                        |
| 11. Die eingesetzten Materialien (inkl. Medien) sind sorgfältig erstellt und werden genau erklärt.                                                                   | Course materials are well prepared and carefully explained.                                 |
| 12. Die zu Semesterbeginn angegebenen Inhalte der Veranstaltung stimmen mit den tatsächlich behandelten überein, so dass mir stets klar ist, was als nächstes kommt. | Proposed objectives agree with those actually taught so you know where the course is going. |
| 13. Die Art und Weise, wie die Inhalte (inkl. Medien) präsentiert werden, erleichtert das Anfertigen von eigenen Notizen.                                            | Instructor gives lectures that facilitate taking notes.                                     |
| 14. Die Inhalte werden gut strukturiert.                                                                                                                             | —                                                                                           |
| <b>Aktivierung<sup>a</sup></b>                                                                                                                                       | <b>Group Interaction</b>                                                                    |
| 15. Die Studierenden werden ermuntert, sich an Diskussionen in der Veranstaltung zu beteiligen.                                                                      | Students are encouraged to participate in class discussions.                                |
| 16. Die Studierenden werden ermutigt, ihre Ideen und ihr Wissen in die Veranstaltung einzubringen.                                                                   | Students are invited to share their ideas and knowledge.                                    |
| 17. Die Studierenden werden ermutigt, Fragen zu stellen, und sie erhalten darauf sinnvolle Antworten.                                                                | Students are encouraged to ask questions and are given meaningful answers.                  |
| 18. Die Studierenden werden ermuntert, eigene Ideen und Fragen zu äußern.                                                                                            | Students are encouraged to express their own ideas and/or question the instructor.          |
| <b>Sozialklima<sup>a</sup></b>                                                                                                                                       | <b>Individual Rapport</b>                                                                   |
| 19. Die Lehrperson ist freundlich zu den Studierenden.                                                                                                               | Instructor is friendly towards individual students.                                         |
| 20. Die Lehrperson gibt den Studierenden das Gefühl, während und außerhalb der Veranstaltung bei ihr Hilfe und Unterstützung erhalten zu können.                     | Instructor makes students feel welcome in seeking help/advice in or outside of class.       |
| 21. Die Lehrperson hat ein echtes Interesse am einzelnen Studierenden.                                                                                               | Instructor has a genuine interest in individual students.                                   |

22. Die Lehrperson steht den Studierenden außerhalb der Veranstaltung zur Verfügung.
- Breite<sup>a</sup>**
23. Die Lehrperson beleuchtet die Inhalte von verschiedenen Seiten.
24. Die Lehrperson stellt die Hintergründe der vorgestellten Inhalte dar.
25. Bei passenden Themen präsentiert die Lehrperson Sichtweisen, die sich von ihren eigenen unterscheiden.
26. Die Lehrperson bringt aktuelle wissenschaftliche Entwicklungen in die Veranstaltung ein.
- Leistungsbewertung<sup>a</sup>**
27. Es gibt nützliches Feedback auf Beiträge von Studierenden (z.B. Wortbeiträge, Referate, Hausaufgaben, Prüfungen).
28. Die Art, wie Beiträge von Studierenden (z.B. Prüfungen, Beiträge in der Veranstaltung) bewertet werden, entspricht den vorab angekündigten Kriterien.
29. Die Art, wie Beiträge von Studierenden (z.B. Prüfungen, Beiträge in der Veranstaltung) bewertet werden, ist gerecht und angemessen.
- Aufgaben<sup>a</sup>**
30. Die vorgeschriebene Begleitliteratur ist nützlich.
31. Begleitliteratur, Hausaufgaben usw. tragen zum besseren Verständnis der Lerninhalte bei.
- Studentische Beiträge<sup>a,\*</sup>**
32. Die Lehrperson wählt passende Themen für Beiträge von Studierenden (z.B. Referate, Inputs, Gruppenarbeiten) aus.\*
33. Die Qualität der Beiträge von Studierenden (z.B. Referate, Inputs, Gruppenarbeiten) ist hoch.\*
34. Ich lerne viel von den Beiträgen meiner Mitstudierenden (z.B. Referate, Inputs, Gruppenarbeiten).\*
35. Die Lehrperson moderiert und ergänzt Beiträge von Studierenden (z.B. Referate, Inputs, Gruppenarbeiten) in sinnvoller Weise.\*
- Hintergrundvariable: Aufwand/Anspruch der Veranstaltung<sup>c</sup>**
41. Wie schätzen Sie den Schwierigkeitsgrad dieser Veranstaltung ein?
42. Wie schätzen Sie den Arbeitsaufwand dieser Veranstaltung ein?
43. Wie schätzen Sie das Tempo dieser Veranstaltung ein?
- Weitere Hintergrundvariablen**
38. Was denken Sie, wie gut werden Sie in der Veranstaltung abschneiden?<sup>b</sup>
44. Wie hoch war Ihr Interesse am Thema vor Beginn der Veranstaltung?<sup>c</sup>
45. Arbeitsaufwand pro Woche für die Veranstaltung in Stunden (ohne Anwesenheit):<sup>d</sup>
46. Wie gut sind Ihre bisherigen Leistungen im Studium (geschätzter Durchschnitt aller Prüfungen, ggf. runden)?<sup>e</sup>
47. Warum besuchen Sie diese Veranstaltung (nur wichtigsten Grund nennen)?<sup>f</sup>
48. Im wievielten Semester studieren Sie in Ihrem aktuellen Studiengang (Fachsemester)?<sup>g</sup>
49. Geschlecht<sup>h</sup>

Instructor is adequately accessible to students during office hours or after class.

**Breadth of Coverage**

Instructor contrasts the implications of various theories.

Instructor presents the background or origin of ideas/concepts developed in class.

Instructor presents points of view other than his/her own when appropriate.

Instructor adequately discusses current developments in field.

**Examinations/Grading**

Feedback on examinations/graded materials is valuable.

Examinations/graded materials test course content as emphasized by instructor.

Methods of evaluating student work are fair and appropriate.

**Assignments/Readings**

Required readings /texts are valuable.

Readings, homeworks, etc., contribute to appreciation and understanding of the subject.

—

—

—

—

—

**Workload/Difficulty**

Course difficulty, relative to other courses, is:

Course workload, relative to other courses, is:

Course pace, relative to other courses, is:

**Student and course characteristics**

Your expected grade in the course

Your level of interest in the subject prior to this course

Hours per week required outside of class

Your overall grade point average

Your reason for taking the course

Your year in school

Sex

**Offene Frage zur Erfassung spezifischer Stärken und Schwächen**

50. Was ist besonders gut, was ist besonders schlecht an der Veranstaltung? Bitte bemühen Sie sich um möglichst konkrete Antworten!

**Open Question**

Do you have any comments to add about your overall evaluation of the course?

---

*Anmerkungen:* Originalitems und Originalbezeichnungen der Faktoren in eckigen Klammern. Alle Items werden, sofern nicht anders angegeben, mit fünfstufigen Antwortskalen vorgegeben. Die mit \* markierten Fragebogenteile sind gegenüber dem Original SEEQ neu und stellen optionale Fragebogenteile dar, die je nach Evaluationskontext hinzugefügt werden können.

<sup>a</sup> Antwortskalen von 1 (*stimme gar nicht zu*) bis 5 (*stimme voll zu*), zusätzliche Antwortmöglichkeit *nicht beurteilbar*.

<sup>b</sup> Antwortskalen von 1 (*mangelhaft*) bis 5 (*sehr gut*).

<sup>c</sup> Antwortskalen von 1 (*sehr gering*) bis 5 (*sehr hoch*).

<sup>d</sup> Antwortmöglichkeiten: „0 Stunden“, „0–1 Stunden“, „2–3 Stunden“, „4–5 Stunden“, „6–7 Stunden“, „mehr als 7 Stunden“.

<sup>e</sup> Antwortmöglichkeiten: „1.0–1.5“, „1.6–2.5“, „2.6–3.5“, „3.6–4.5“, „schlechter als 4.5“.

<sup>f</sup> Antwortmöglichkeiten: „Pflicht“, „Wahlpflicht“, „Termin“, „Interesse“, „Prüfungsvorbereitung“.

<sup>g</sup> Antwortmöglichkeiten: „1.–2. Semester“, „3.–4. Semester“, „5.–6. Semester“, „7.–8. Semester“, „9.–10. Semester“, „11. oder höher“.

<sup>h</sup> Antwortmöglichkeiten: „männlich“, „weiblich“.
