# Supplementary material for: SEEQ-DE
Source: Atypon-hosted journal article supplement (doi:10.1026/0012-1924/a000274), 2021-06-14
Supplement: 0012-1924_a000274_esm3.pdf [file 0012-1924_a000274_esm3.pdf]

### ESM 3. Muster für den Einsatz des SEEQ-DE mittels EvaSys (Electric Paper, 2015)

Markierung:     Bitte verwenden Sie einen Kugelschreiber oder einen nicht zu starken Filzstift  
 Korrektur:     Dieser Fragebogen wird maschinell erfasst.  
 Bitte beachten Sie im Interesse einer optimalen Datenerfassung die links gegebenen Hinweise beim Ausfüllen.

**Fragebogen zur Evaluation von Lehrveranstaltungen**

Liebe Studierende, mit der Beantwortung dieses Fragebogens unterstützen Sie die Qualitätssicherung im Bereich der Lehrveranstaltungen. Denken Sie beim Beurteilen an alle bisherigen Sitzungen in diesem Semester. Vielen Dank für Ihre Mithilfe! Fragen oder Anregungen zur Evaluation bitte an [evaluation@qa.uni-augsburg.de](mailto:evaluation@qa.uni-augsburg.de) ([www.uni-augsburg.de/einrichtungen/qa/](http://www.uni-augsburg.de/einrichtungen/qa/))

Studiengang: 100er             
 10er             
 1er             
 Bitte kreuzen Sie für Ihren Studiengang (Hauptfach) die entsprechenden 3 Nummern an  
 x0 x1 x2 x3 x4 x5 x6 x7 x8 x9

Beispiel: Sozialwissenschaften B.A. mit der Kennziffer 411: 4 bei 100er / 1 bei 10er / 1 bei 1er

|                                                                                                                                                                      | stimme gar nicht zu      | stimme voll zu           | nicht beurteilbar        |
|----------------------------------------------------------------------------------------------------------------------------------------------------------------------|--------------------------|--------------------------|--------------------------|
| 1. Ich habe in dieser Veranstaltung Dinge gelernt, die sinnvoll und wichtig sind.                                                                                    | <input type="checkbox"/> | <input type="checkbox"/> | <input type="checkbox"/> |
| 2. Mein Interesse an den behandelten Inhalten ist durch diese Veranstaltung gestiegen.                                                                               | <input type="checkbox"/> | <input type="checkbox"/> | <input type="checkbox"/> |
| 3. Den Stoff dieser Veranstaltung habe ich verstanden.                                                                                                               | <input type="checkbox"/> | <input type="checkbox"/> | <input type="checkbox"/> |
| 4. Ich habe viel in dieser Veranstaltung dazu gelernt.                                                                                                               | <input type="checkbox"/> | <input type="checkbox"/> | <input type="checkbox"/> |
| 5. Diese Veranstaltung regt mich zum Nachdenken an.                                                                                                                  | <input type="checkbox"/> | <input type="checkbox"/> | <input type="checkbox"/> |
| 6. Die Lehrperson ist begeistert von ihrer Lehrtätigkeit.                                                                                                            | <input type="checkbox"/> | <input type="checkbox"/> | <input type="checkbox"/> |
| 7. Die Lehrperson hält die Veranstaltung dynamisch und aktiv.                                                                                                        | <input type="checkbox"/> | <input type="checkbox"/> | <input type="checkbox"/> |
| 8. Die Lehrperson nutzt Humor, um ihre Darstellungen anschaulicher zu machen.                                                                                        | <input type="checkbox"/> | <input type="checkbox"/> | <input type="checkbox"/> |
| 9. Durch die Art und Weise, wie die Lehrperson die Inhalte darstellt, bleibt mein Interesse während der Sitzungen aufrechterhalten.                                  | <input type="checkbox"/> | <input type="checkbox"/> | <input type="checkbox"/> |
| 10. Die Erklärungen der Lehrperson sind verständlich.                                                                                                                | <input type="checkbox"/> | <input type="checkbox"/> | <input type="checkbox"/> |
| 11. Die eingesetzten Materialien (inkl. Medien) sind sorgfältig erstellt und werden genau erklärt.                                                                   | <input type="checkbox"/> | <input type="checkbox"/> | <input type="checkbox"/> |
| 12. Die zu Semesterbeginn angegebenen Inhalte der Veranstaltung stimmen mit den tatsächlich behandelten überein, so dass mir stets klar ist, was als nächstes kommt. | <input type="checkbox"/> | <input type="checkbox"/> | <input type="checkbox"/> |
| 13. Die Art und Weise, wie die Inhalte (inkl. Medien) präsentiert werden, erleichtert das Anfertigen von eigenen Notizen.                                            | <input type="checkbox"/> | <input type="checkbox"/> | <input type="checkbox"/> |
| 14. Die Inhalte werden gut strukturiert.                                                                                                                             | <input type="checkbox"/> | <input type="checkbox"/> | <input type="checkbox"/> |
| 15. Die Studierenden werden ermuntert, sich an Diskussionen in der Veranstaltung zu beteiligen.                                                                      | <input type="checkbox"/> | <input type="checkbox"/> | <input type="checkbox"/> |
| 16. Die Studierenden werden ermutigt, ihre Ideen und ihr Wissen in die Veranstaltung einzubringen.                                                                   | <input type="checkbox"/> | <input type="checkbox"/> | <input type="checkbox"/> |
| 17. Die Studierenden werden ermutigt, Fragen zu stellen, und sie erhalten darauf sinnvolle Antworten.                                                                | <input type="checkbox"/> | <input type="checkbox"/> | <input type="checkbox"/> |
| 18. Die Studierenden werden ermuntert, eigene Ideen und Fragen zu äußern.                                                                                            | <input type="checkbox"/> | <input type="checkbox"/> | <input type="checkbox"/> |
| 19. Die Lehrperson ist freundlich zu den Studierenden.                                                                                                               | <input type="checkbox"/> | <input type="checkbox"/> | <input type="checkbox"/> |
| 20. Die Lehrperson gibt den Studierenden das Gefühl, während und außerhalb der Veranstaltung bei ihr Hilfe und Unterstützung erhalten zu können.                     | <input type="checkbox"/> | <input type="checkbox"/> | <input type="checkbox"/> |
| 21. Die Lehrperson hat ein echtes Interesse an einzelnen Studierenden.                                                                                               | <input type="checkbox"/> | <input type="checkbox"/> | <input type="checkbox"/> |
| 22. Die Lehrperson steht den Studierenden außerhalb der Veranstaltung zur Verfügung.                                                                                 | <input type="checkbox"/> | <input type="checkbox"/> | <input type="checkbox"/> |
| 23. Die Lehrperson beleuchtet die Inhalte von verschiedenen Seiten.                                                                                                  | <input type="checkbox"/> | <input type="checkbox"/> | <input type="checkbox"/> |
| 24. Die Lehrperson stellt die Hintergründe der vorgestellten Inhalte dar.                                                                                            | <input type="checkbox"/> | <input type="checkbox"/> | <input type="checkbox"/> |
| 25. Bei passenden Themen präsentiert die Lehrperson Sichtweisen, die sich von ihren eigenen unterscheiden.                                                           | <input type="checkbox"/> | <input type="checkbox"/> | <input type="checkbox"/> |
| 26. Die Lehrperson bringt aktuelle wissenschaftliche Entwicklungen in die Veranstaltung ein.                                                                         | <input type="checkbox"/> | <input type="checkbox"/> | <input type="checkbox"/> |

F317U0P1PL0V0

|                                                                                                                                                           | stimme gar nicht zu      | stimme voll zu           | nicht beurteilbar        |
|-----------------------------------------------------------------------------------------------------------------------------------------------------------|--------------------------|--------------------------|--------------------------|
| 27. Es gibt nützliches Feedback auf Beiträge von Studierenden (z.B. Wortbeiträge, Referate, Hausaufgaben, Prüfungen).                                     | <input type="checkbox"/> | <input type="checkbox"/> | <input type="checkbox"/> |
| 28. Die Art, wie Beiträge von Studierenden (z.B. Prüfungen, Beiträge in der Veranstaltung) bewertet werden, entspricht den vorab angekündigten Kriterien. | <input type="checkbox"/> | <input type="checkbox"/> | <input type="checkbox"/> |
| 29. Die Art, wie Beiträge von Studierenden (z.B. Prüfungen, Beiträge in der Veranstaltung) bewertet werden, ist gerecht und angemessen.                   | <input type="checkbox"/> | <input type="checkbox"/> | <input type="checkbox"/> |
| 30. Die vorgeschriebene Begleitliteratur ist nützlich.                                                                                                    | <input type="checkbox"/> | <input type="checkbox"/> | <input type="checkbox"/> |
| 31. Begleitliteratur, Hausaufgaben usw. tragen zum besseren Verständnis der Lerninhalte bei.                                                              | <input type="checkbox"/> | <input type="checkbox"/> | <input type="checkbox"/> |
| 32. Die Lehrperson wählt passende Themen für Beiträge von Studierenden (z.B. Referate, Inputs, Gruppenarbeiten) aus.                                      | <input type="checkbox"/> | <input type="checkbox"/> | <input type="checkbox"/> |
| 33. Die Qualität der Beiträge von Studierenden (z.B. Referate, Inputs, Gruppenarbeiten) ist hoch.                                                         | <input type="checkbox"/> | <input type="checkbox"/> | <input type="checkbox"/> |
| 34. Ich lerne viel von den Beiträgen meiner Mitstudierenden (z.B. Referate, Inputs, Gruppenarbeiten).                                                     | <input type="checkbox"/> | <input type="checkbox"/> | <input type="checkbox"/> |
| 35. Die Lehrperson moderiert und ergänzt Beiträge von Studierenden (z.B. Referate, Inputs, Gruppenarbeiten) in sinnvoller Weise.                          | <input type="checkbox"/> | <input type="checkbox"/> | <input type="checkbox"/> |

|                                                                                                             | mangelhaft               | sehr gut                 |
|-------------------------------------------------------------------------------------------------------------|--------------------------|--------------------------|
| 36. Wie schneidet diese Veranstaltung im Vergleich zu anderen Lehrveranstaltungen ab, die Sie belegt haben? | <input type="checkbox"/> | <input type="checkbox"/> |
| 37. Wie schneidet diese Lehrperson im Vergleich zu anderen Lehrpersonen ab, die Sie hatten?                 | <input type="checkbox"/> | <input type="checkbox"/> |
| 38. Was denken Sie, wie gut werden Sie in der Veranstaltung abschneiden?                                    | <input type="checkbox"/> | <input type="checkbox"/> |
| 39. Welche Note geben Sie der Veranstaltung insgesamt?                                                      | <input type="checkbox"/> | <input type="checkbox"/> |
| 40. Welche Note geben Sie der Lehrperson insgesamt?                                                         | <input type="checkbox"/> | <input type="checkbox"/> |

|                                                                                                                 | sehr gering                                                                            | sehr hoch                                                                                                                                                                              |
|-----------------------------------------------------------------------------------------------------------------|----------------------------------------------------------------------------------------|----------------------------------------------------------------------------------------------------------------------------------------------------------------------------------------|
| 41. Wie schätzen Sie den Schwierigkeitsgrad dieser Veranstaltung ein?                                           | <input type="checkbox"/>                                                               | <input type="checkbox"/>                                                                                                                                                               |
| 42. Wie schätzen Sie den Arbeitsaufwand dieser Veranstaltung ein?                                               | <input type="checkbox"/>                                                               | <input type="checkbox"/>                                                                                                                                                               |
| 43. Wie schätzen Sie das Tempo dieser Veranstaltung ein?                                                        | <input type="checkbox"/>                                                               | <input type="checkbox"/>                                                                                                                                                               |
| 44. Wie hoch war Ihr Interesse am Thema vor Beginn der Veranstaltung?                                           | <input type="checkbox"/>                                                               | <input type="checkbox"/>                                                                                                                                                               |
| 45. Arbeitsaufwand pro Woche für die Veranstaltung in Stunden (ohne Anwesenheit):                               | <input type="checkbox"/> 0 Stunden<br><input type="checkbox"/> bis unter 3 Stunden     | <input type="checkbox"/> bis unter 1 Stunde<br><input type="checkbox"/> bis unter 4 Stunden<br><input type="checkbox"/> bis unter 2 Stunden<br><input type="checkbox"/> über 4 Stunden |
| 46. Wie gut sind Ihre bisherigen Leistungen im Studium (geschätzter Durchschnitt aller Prüfungen, ggf. runden): | <input type="checkbox"/> 1,0 - 1,5<br><input type="checkbox"/> 3,6 - 4,5               | <input type="checkbox"/> 1,6 - 2,5<br><input type="checkbox"/> schlechter als 4,5<br><input type="checkbox"/> 2,6 - 3,5                                                                |
| 47. Warum besuchen Sie diese Veranstaltung (nur wichtigsten Grund nennen)?                                      | <input type="checkbox"/> Pflicht<br><input type="checkbox"/> Interesse                 | <input type="checkbox"/> Wahlpflicht<br><input type="checkbox"/> Prüfungsvorbereitung<br><input type="checkbox"/> Termin                                                               |
| 48. Im wievielten Semester studieren Sie in Ihrem aktuellen Studiengang (Fachsemester)?                         | <input type="checkbox"/> 1. - 2. Semester<br><input type="checkbox"/> 7. - 8. Semester | <input type="checkbox"/> 3. - 4. Semester<br><input type="checkbox"/> 9. - 10. Semester<br><input type="checkbox"/> 5. - 6. Semester<br><input type="checkbox"/> 11. oder höher        |
| 49. Geschlecht:                                                                                                 | <input type="checkbox"/> männlich                                                      | <input type="checkbox"/> weiblich                                                                                                                                                      |

50. Was ist besonders gut, was ist besonders schlecht an der Veranstaltung? Bitte bemühen Sie sich um möglichst konkrete Antworten.

F317U0P2PL0V0
