# Supplementary material for: SEEQ-DE
Source: Atypon-hosted journal article supplement (doi:10.1026/0012-1924/a000274), 2021-06-14
Supplement: 0012-1924_a000274_esm4.pdf [file 0012-1924_a000274_esm4.pdf]

#### ESM 4. Durchführungsinstruktion für Testleiter\_innen bzw. Dozierende

##### Hinweise zur Durchführung der Lehrveranstaltungsevaluation

Liebe Dozentin, lieber Dozent,

herzlichen Dank für Ihre Bereitschaft, an der fakultätsweiten Evaluation von Lehrveranstaltungen mitzuwirken. Sie dient dazu, Ihnen Feedback zur Lehre zu geben und Informationen für den Lehrbericht zu erhalten.

Einsicht in die Ergebnisse der einzelnen Lehrveranstaltungen erhalten lediglich der Studiendekan, die Leiter(innen) der entsprechenden Arbeitseinheiten sowie eine einzelne Mitarbeiterin, die die Fragebögen auswertet. Ergebnisse werden ausschließlich aggregiert (im Lehrbericht) veröffentlicht (nicht auf der Ebene einzelner Veranstaltungen/Dozenten). Persönlich erhalten Sie per Email eine schriftliche Ergebnisrückmeldung.

Das vorgeschlagene Zeitfenster für die Evaluation ist vom XX.XX.XXXX bis YY.YY.YYYY. Wenn möglich bitten Sie die Studierenden, in diesem Zeitfenster die beiliegenden Fragebögen auszufüllen. Zur Sicherstellung eines ausreichenden Rücklaufs sollten diese während der regulären Veranstaltungszeit ausgefüllt werden (Empfehlung: Beginn einer Sitzung). Das Ausfüllen des Fragebogens nimmt etwa 10 Minuten in Anspruch.

Gehen Sie bitte wie folgt vor:

1. Prüfen Sie vorab die Anzahl der Fragebögen. Sollten nicht ausreichend Fragebögen vorhanden sein, sind in Ihrem Sekretariat weitere hinterlegt. Bitte auf keinen Fall Fragebögen einfach kopieren, da diese nicht gescannt und somit nicht ausgewertet werden können.
2. Lassen Sie in der Lehrveranstaltung Studierende die Fragebögen austeilen.
3. Bitten Sie vorab die Studierenden, ihren Studiengang in den Fragebogen einzutragen. Lesen Sie dazu die Nummer(n) des Studiengangs/ der Studiengänge in Ihrer Veranstaltung vor. Eine Liste der Studiengänge findet sich auf der Rückseite des Deckblattes zu Ihrer Veranstaltung.
4. Lesen Sie folgende Erläuterung/Instruktion vor:

*Liebe Studierende,*

*bitte schätzen Sie anhand des Fragebogens diese Lehrveranstaltung ein. Beachten Sie hierbei nicht nur den heutigen Termin. Beantworten Sie jede Aussage möglichst genau und differenziert. Alle Ergebnisse werden anonymisiert ausgewertet. Sie werden dazu verwendet, künftige Lehrveranstaltungen zu optimieren und an die Dozierenden in anonymisierter Form rückgemeldet. Mit ihrer sorgfältigen Beantwortung unterstützen Sie die Bemühungen um eine effektive Lehre. Bitte verwenden Sie nur schwarze Stifte und machen Sie die Kreuze sauber und eindeutig.*

*Vielen Dank für Ihre Teilnahme.*

5. Bitten Sie eine(n) Studierende(n), die Fragebögen einzusammeln und gemeinsam mit dem Deckblatt in das Kuvert zu stecken und es zu verschließen. Hierbei sollte das Deckblatt oben auf liegen.
6. Schicken Sie das verschlossene Kuvert bitte zeitnah per Hauspost an ZZZ.

Noch ein Hinweis zur Teilnehmerzahl bei der Evaluation: Die Messgenauigkeit des Fragebogens sinkt bei einer Teilnehmeranzahl von weniger als neun Personen unter eine kritische Grenze. Zudem ist in diesem Fall die Anonymität der Studierenden eingeschränkt. Daher werden nur Veranstaltungen ausgewertet, für die mindestens acht ausgefüllte Evaluationsbögen vorliegen.

Vielen Dank für Ihre Beteiligung! Bei Fragen können Sie sich gerne an mich wenden.

Beste Grüße
