# Supplementary material for: SEEQ-DE
Source: Atypon-hosted journal article supplement (doi:10.1026/0012-1924/a000274), 2021-06-14
Supplement: 0012-1924_a000274_esm5.pdf [file 0012-1924_a000274_esm5.pdf]

**ESM 5.** Ergebnisse der Faktorenanalysen

|                                                                                                             | <i>df</i> | $\chi^2$ | CFI  | TLI  | RMSEA | SRMR   |         |
|-------------------------------------------------------------------------------------------------------------|-----------|----------|------|------|-------|--------|---------|
|                                                                                                             |           |          |      |      |       | within | between |
| ESEM Analyse auf Veranstaltungsebene ( <i>N</i> = 3 660)                                                    |           |          |      |      |       |        |         |
| 1-Faktor Modell                                                                                             | 702       | 64 918   | .588 | .565 | .164  | .095   |         |
| 10-Faktoren Modell                                                                                          | 396       | 7 879    | .958 | .921 | .070  | .016   |         |
| Konfirmatorische 2-Ebenen-Analysen: Studierende ( <i>N</i> = 76 687) in Veranstaltungen ( <i>N</i> = 3 660) |           |          |      |      |       |        |         |
| 1-Faktor Modell                                                                                             | 1 442     | 471 894  | .642 | .633 | .067  | .077   | .110    |
| 10-Faktoren Modell                                                                                          | 1 339     | 115 276  | .913 | .904 | .034  | .041   | .076    |
| Multi-Gruppen Modelle                                                                                       |           |          |      |      |       |        |         |
| Konfigurale Messinvarianz                                                                                   | 3 983     | 113 841  | .911 | .901 | .035  | .035   | .063    |
| Metrische Messinvarianz                                                                                     | 4 053     | 115 485  | .910 | .901 | .034  | .035   | .063    |
| Skalare Messinvarianz                                                                                       | 4 132     | 118 954  | .907 | .900 | .035  | .035   | .064    |

*Anmerkungen:* Multi-Gruppen-Modelle: 797 Übungen (*n* = 24 699 Studierende), 2 497 Seminare (*n* = 41 415) und 105 Vorlesungen (*n* = 5 447). Neben dem postulierten 10-Faktoren Modell berichten wir zum Vergleich die Ergebnisse eines 1-Faktor-Modells, das nicht zwischen den verschiedenen SEEQ-Dimensionen der Lehrqualität unterscheidet.
