# Supplementary material for: SEEQ-DE
Source: Atypon-hosted journal article supplement (doi:10.1026/0012-1924/a000274), 2021-06-14
Supplement: 0012-1924_a000274_esm6.pdf [file 0012-1924_a000274_esm6.pdf]

**ESM 6.** Ergebnisse der ESEM-Analyse zur Faktorstruktur auf Veranstaltungsebene

|                                              | F1   | F2   | F3   | F4   | F5   | F6   | F7   | F8   | F9   | F10  |
|----------------------------------------------|------|------|------|------|------|------|------|------|------|------|
| <b>Lernzuwachs</b>                           |      |      |      |      |      |      |      |      |      |      |
| Sinnvolles und Wichtiges gelernt             | .58  | .09  | .03  | .14  | .03  | .04  | .09  | .03  | .13  | .10  |
| Interesse gestiegen                          | .60  | .02  | .08  | -.02 | .05  | .07  | .17  | .01  | .15  | .16  |
| Stoff verstanden                             | .31  | -.10 | .10  | .25  | .12  | .08  | .01  | -.48 | -.05 | .28  |
| Viel dazugelernt                             | .54  | .07  | .09  | .16  | .03  | .05  | .07  | .13  | .13  | .16  |
| Zum Nachdenken angeregt                      | .45  | -.02 | .01  | -.14 | .19  | .03  | .34  | .07  | .19  | .09  |
| <b>Gesamtbeurteilung</b>                     |      |      |      |      |      |      |      |      |      |      |
| Abschneiden der Lehrveranstaltung            | .48  | .38  | .14  | .10  | .05  | .04  | -.03 | -.02 | .11  | .10  |
| Abschneiden des Dozierenden                  | .07  | .60  | .25  | .05  | .04  | .13  | .07  | .03  | .06  | .01  |
| Note für Lehrveranstaltung                   | .46  | .36  | .13  | .12  | .04  | .07  | .01  | -.03 | .12  | .10  |
| Note für Dozierenden                         | .07  | .59  | .23  | .08  | .04  | .15  | .07  | .02  | .07  | .02  |
| <b>Engagement der Lehrperson</b>             |      |      |      |      |      |      |      |      |      |      |
| Begeistert von Lehrtätigkeit                 | .01  | .22  | .46  | .01  | .12  | .16  | .22  | -.03 | .05  | .01  |
| Dynamisch und aktiv                          | .05  | .17  | .66  | .12  | .12  | .06  | .04  | .03  | .03  | .04  |
| Einsatz von Humor                            | -.01 | .14  | .63  | -.05 | .05  | .05  | .12  | -.09 | .09  | .08  |
| Interesse bleibt aufrecht                    | .22  | .16  | .51  | .14  | .06  | .06  | .04  | .06  | .11  | .06  |
| <b>Stoffstrukturierung und -präsentation</b> |      |      |      |      |      |      |      |      |      |      |
| Erklärungen verständlich                     | .10  | .27  | .14  | .40  | .08  | .10  | .11  | -.18 | -.02 | .03  |
| Sorgfältig erstellt, genau erklärt           | .02  | .07  | .14  | .64  | -.02 | .10  | .05  | -.04 | .03  | .07  |
| Übereinstimmung der Inhalte                  | -.02 | .18  | -.27 | .43  | .06  | .02  | .14  | -.06 | .18  | .02  |
| Präsentation gut für Notizen                 | .07  | -.03 | .12  | .61  | .01  | .11  | -.01 | .03  | .15  | .05  |
| Inhalte gut strukturiert                     | .06  | .11  | -.01 | .74  | .01  | .04  | .05  | .02  | .11  | .04  |
| <b>Aktivierung der Studierenden</b>          |      |      |      |      |      |      |      |      |      |      |
| Beteiligung an Diskussionen                  | .02  | .02  | .05  | -.03 | .73  | .01  | .15  | -.03 | .04  | .17  |
| Ideen/Wissen einbringen                      | .02  | .02  | .06  | -.03 | .74  | .04  | .11  | -.04 | .05  | .18  |
| Fragen stellen und gute Antworten            | .09  | .15  | .09  | .13  | .59  | .16  | .03  | .05  | .09  | -.01 |
| Ideen und Fragen äußern                      | .05  | .06  | .09  | .04  | .72  | .14  | .03  | .02  | .09  | .07  |
| <b>Sozialklima</b>                           |      |      |      |      |      |      |      |      |      |      |
| Freundlich                                   | -.07 | .42  | .05  | .04  | .09  | .40  | .01  | -.08 | .07  | -.07 |
| Unterstützung                                | .02  | .09  | .04  | .07  | .04  | .83  | .02  | .01  | .03  | .01  |
| Echtes Interesse an Studierenden             | .05  | .08  | .19  | .01  | .06  | .62  | .05  | -.01 | .09  | .09  |
| Hilfe außerhalb der Veranstaltung            | .02  | .01  | -.05 | .03  | .05  | .74  | .09  | .04  | .08  | .09  |
| <b>Stoffbreite</b>                           |      |      |      |      |      |      |      |      |      |      |
| Verschiedene Seiten                          | .10  | .09  | .14  | .07  | .09  | .12  | .54  | .04  | .10  | .06  |
| Hintergründe der Inhalte                     | .09  | .07  | .13  | .12  | .03  | .09  | .62  | .01  | .08  | .05  |
| Unterschiedliche Sichtweisen                 | .05  | .07  | .07  | .02  | .09  | .08  | .51  | .02  | .13  | .09  |
| Aktuelle Entwicklungen                       | -.02 | -.04 | -.02 | .02  | .10  | .03  | .61  | -.01 | .07  | .15  |
| <b>Leistungsbewertung</b>                    |      |      |      |      |      |      |      |      |      |      |
| Nützliches Feedback                          | .03  | .04  | -.02 | -.04 | .03  | -.01 | .04  | .96  | .07  | .01  |
| Bewertung wie vorab angekündigt              | .04  | -.08 | -.05 | .04  | .11  | .05  | -.05 | .78  | -.09 | .10  |
| Bewertung gerecht                            | .04  | -.03 | .10  | .06  | -.13 | .02  | .02  | .77  | .03  | .01  |
| <b>Aufgaben</b>                              |      |      |      |      |      |      |      |      |      |      |
| Begleitliteratur nützlich                    | -.03 | -.03 | -.01 | -.02 | -.02 | .01  | .07  | -.04 | .79  | .05  |
| Begleitliteratur gut für Verständnis         | .06  | .01  | .02  | .06  | .02  | .04  | -.06 | .08  | .79  | .01  |
| <b>Studentische Beiträge</b>                 |      |      |      |      |      |      |      |      |      |      |
| Passende Themen für Beiträge                 | -.04 | .10  | -.03 | .07  | .12  | .07  | .14  | -.12 | .26  | .43  |
| Qualität der Beiträge hoch                   | .04  | -.02 | .04  | .05  | .05  | .04  | .02  | .04  | .04  | .79  |
| Hoher Lernzuwachs durch Beiträge             | .09  | .01  | .01  | -.03 | .07  | .04  | .05  | .04  | .08  | .79  |
| Sinnvolle Ergänzungen                        | -.04 | .28  | .02  | .06  | .21  | .05  | .21  | -.01 | .12  | .31  |

*Anmerkungen:* N = 3 660 Veranstaltungen. Berichtet sind die rotierten Faktorladungen der ESEM-Analyse mit Geomin-Rotation und 10 Faktoren basierend auf den auf Veranstaltungsebene aggregierten Item-Mittelwerten. Alle Parameterschätzungen sind vollständig standardisiert. Basierend auf den Ergebnissen von Marsh et al. (2009) a priori angenommene Ladungen sind grau hinterlegt.
