# Supplementary material for: SEEQ-DE
Source: Atypon-hosted journal article supplement (doi:10.1026/0012-1924/a000274), 2021-06-14
Supplement: 0012-1924_a000274_esm7.pdf [file 0012-1924_a000274_esm7.pdf]

**ESM 7.** Ergebnisse der Faktorenanalysen ohne den Faktor „Studentische Beiträge“

|                                                                                                             | <i>df</i> | $\chi^2$ | CFI  | TLI  | RMSEA | SRMR   |         |
|-------------------------------------------------------------------------------------------------------------|-----------|----------|------|------|-------|--------|---------|
|                                                                                                             |           |          |      |      |       | within | between |
| ESEM Analyse auf Veranstaltungsebene ( <i>N</i> = 3 660)                                                    |           |          |      |      |       |        |         |
| 9-Faktoren Modell                                                                                           | 316       | 6 343    | .957 | .920 | .075  | .012   |         |
| Konfirmatorische 2-Ebenen-Analysen: Studierende ( <i>N</i> = 76 687) in Veranstaltungen ( <i>N</i> = 3 660) |           |          |      |      |       |        |         |
| 9-Faktoren Modell                                                                                           | 1 070     | 93 398   | .924 | .916 | .034  | .036   | .074    |
| Multi-Gruppen Modelle                                                                                       |           |          |      |      |       |        |         |
| Konfigurale Messinvarianz                                                                                   | 3 178     | 91 456   | .923 | .913 | .035  | .031   | .062    |
| Metrische Messinvarianz                                                                                     | 3 243     | 93 015   | .922 | .914 | .034  | .032   | .062    |
| Skalare Messinvarianz                                                                                       | 3 314     | 96 448   | .919 | .912 | .035  | .031   | .063    |

*Anmerkungen:* Multi-Gruppen-Modelle: 797 Übungen (*n* = 24 699 Studierende), 2 497 Seminare (*n* = 41 415) und 105 Vorlesungen (*n* = 5 447).
