# Supplementary material for: SEEQ-DE
Source: Atypon-hosted journal article supplement (doi:10.1026/0012-1924/a000274), 2021-06-14
Supplement: 0012-1924_a000274_esm9.pdf [file 0012-1924_a000274_esm9.pdf]

## ESM 9. Beschreibung der Evaluationsergebnisse

### Interpretationshilfe zu Ihrem Evaluationsergebnis

#### Vorbemerkungen

Auf den folgenden Seiten finden Sie Hinweise zur Interpretation des Evaluationsergebnisses Ihrer Lehrveranstaltung und zu möglichen Folgerungen für die Verbesserung der Lehrqualität. Erfasst wird die Lehrqualität in vier Bereichen:

- **Lehrerfolg:** Lehre ist – unabhängig von der Wahl der Mittel – dann erfolgreich, wenn sie übergeordnete Ziele erreicht (z.B. Lernzuwachs, eine positive Gesamtbewertung der Veranstaltung). Der Lehrerfolg bezieht sich auf das Ausmaß, in dem diese Ziele erreicht werden. Falls Ergebnisse verschiedener Veranstaltungen verglichen werden sollen, sollte (nur) der Lehrerfolg herangezogen werden. Wenn Sie diesbezüglich mit Ihren Evaluationsergebnissen zufrieden sind, brauchen Sie nichts weiter zu unternehmen. Sollten Sie noch Anregungen zur Optimierung Ihrer Veranstaltung benötigen, dann orientieren Sie sich bitte an den folgenden Erläuterungen.
- **Didaktisches Handeln:** Darunter sind konkrete Handlungen der Lehrenden subsumiert, die bedeutsam zum Lehrerfolg beitragen. Der Schwerpunkt liegt auf verhaltensnahen Aspekten, die gut beeinflusst werden können (z.B. Strukturierung des Stoffs). Ansatzpunkte zur Verbesserung des Lehrerfolgs lassen sich deshalb am besten anhand des didaktischen Handelns identifizieren. Da unterschiedliches didaktisches Handeln zu Lehrerfolg führen kann, gibt es keinen Prototypen für das beste didaktische Handeln (insbesondere ist es für ein gutes Evaluationsergebnis nicht notwendig, bei allen Teilaspekten überdurchschnittlich abzuschneiden).
- **Merkmale der Lehrperson:** Einschätzung darüber, inwieweit es der Lehrperson mit ihren individuellen Eigenschaften gelingt, Interesse zu wecken und freundlich und unterstützend den Studierenden zur Seite zu stehen.
- **Studentische Bedingungen:** Diese dienen der Einordnung der Ergebnisse und zur Erstellung von Untergruppenauswertungen (z.B. Studiengang, Geschlecht, Vorwissen). Sie sind nicht Teil des Feedbacks.

#### 1. Lehrerfolg

##### 1.1. Lernzuwachs (Fragen 1 – 5)

Einschätzung darüber, wie viel die Studierenden in der Veranstaltung lernen, in welchem Ausmaß sie ein tieferes Verständnis des Veranstaltungsthemas gewinnen und in welchem Ausmaß bei den Studierenden das Interesse am Thema gefördert wird. Dieser Indikator dient – gemeinsam mit dem Indikator „Gesamtbeurteilung“ – der Beurteilung des Lehrerfolgs der Lehrveranstaltung.

##### 1.2. Gesamtbeurteilung (Fragen 36, 37, 39, 40)

Gesamtbewertung der Lehrqualität der Lehrveranstaltung. Sie umfasst die Bewertung der Veranstaltung und die Bewertung der Lehrperson in Bezug auf andere Veranstaltungen respektive anderer Lehrpersonen und in Bezug auf eine Note (1 = mangelhaft, 5 = sehr gut).

#### 2. Didaktisches Handeln

##### 2.1. Stoffstrukturierung/-präsentation (Fragen 10 – 14)

Einschätzung darüber, in welchem Ausmaß der Stoff lernförderlich strukturiert und erklärt wird (z.B. Stoff verständlich erklären, Wichtiges hervorheben oder Stoff vernetzen).

##### 2.2. Aktivierung der Studierenden (Fragen 15 – 18)

Ausmaß, in dem Studierende ermuntert werden, sich aktiv in die Lehrveranstaltung einzubringen (z.B. Einbringen von eigenem Wissen oder Beteiligung an Diskussionen).

##### 2.3. Stoffbreite (Fragen 23 – 26)

Ausmaß, in dem der Stoff mit unterschiedlichen Perspektiven gelehrt wird (z.B. Berücksichtigung verschiedener theoretischer Sichtweisen und Hintergründe, Einbezug aktueller wissenschaftlicher Entwicklungen, Praxisbezüge).

##### 2.4. Leistungsbewertung (Fragen 27 – 29)

Ausmaß, in dem Leistungsbewertungen (z.B. bei Beiträgen in der Lehrveranstaltung) klar vorab angekündigten Kriterien entsprechen, fair sind und einen Nutzen für die Studierenden darstellen.

##### 2.5. Aufgaben (Fragen 30 – 31)

Ausmaß, in dem Haus-/Übungsaufgaben und Begleitliteratur zu einem Verständnis beitragen.

##### 2.6. Studentische Beiträge (Fragen 32 – 35)

Ausmaß, in dem Beiträge von Studierenden (z.B. Diskussionsbeiträge, Referate, Gruppenarbeiten) effektiv für das Lernen sind und sinnvoll durch die Lehrperson moderiert und ergänzt werden.

##### 2.7. Aufwand/Anspruch der Veranstaltung (Fragen 41 – 43)

Ausmaß des Schwierigkeitsgrades, des Arbeitsaufwandes und des Tempos der Veranstaltung.

#### 3. Merkmale der Lehrperson

##### 3.1. Engagement Lehrperson (Fragen 6 – 9)

Einschätzung darüber, wie engagiert die Lehrperson ist, wie sehr sie begeistert und wie es ihr gelingt, die Lehrveranstaltung interessant zu gestalten.

##### 3.2. Sozialklima (Fragen 19 – 22)

Ausmaß, in dem eine freundliche Atmosphäre im Umgang der Lehrperson mit Studierenden besteht (inkl. Interesse an Studierenden, Anliegen Studierender werden ernst genommen).
